# Supplementary material
Source: PubMed Central journal article supplement (PMC3004329)
Supplement: supp_84_24_12636__1.pdf [file supp_84_24_12636__1.pdf]

**Supplementary Table 1.** Nucleotide substitutions in CIV sequences that are either CIV associated or CIV specific, comparing the variant positions in the EIV and CIV sequences. Full-line shading is of nonsynonymous substitutions that were conserved in nearly all (up to three) EIV isolates for which there are sequences available, but which differed among some of the CIV isolates. Half-line shading is of synonymous substitutions.

| <u>HA</u> | Amino acid site  | nucleotide site | equine references        | canine 2003-05              | canine 2006-09 | NY 2008-09 | Amino acids             |
|-----------|------------------|-----------------|--------------------------|-----------------------------|----------------|------------|-------------------------|
|           | 7 <sup>^</sup>   | 20              | 158 G; 47 A              | A and G                     | G              | G          | D/N/G to G              |
|           | 29 <sup>^</sup>  | 87              | all A                    | A and G                     | G              | G          | I/L to M                |
|           | 54*              | 162             | 196 C; 9 T               | A                           | A              | A          | N to K                  |
|           | 58               | 172             | 132 G; 73 A              | all A                       | A and G        | G          | I/V to V                |
|           | 75               | 225             | 177 C; 28 T              | all C                       | all C          | G          | H to Q                  |
|           | 78*              | 233             | 157 T; 28 C's;<br>20 A's | C                           | C              | C          | V/D/A to A              |
|           | 79*              | 235             | all T                    | all T except C<br>in Iowa05 | T              | T          | F except L in Iowa05    |
|           | 83 <sup>^</sup>  | 248             | 200 A; 5 G's             | G                           | G              | G          | N/K/S to S              |
|           | 92 <sup>^</sup>  | 275             | 199 G; 6 A               | G except A in<br>Flor04     | A              | A          | S/N to N                |
|           | 107*             | 319             | 204 T; 1 C               | T except C in<br>Jacks05    | T              | T          | S except P in Jacks05   |
|           | 118 <sup>^</sup> | 352             | all T                    | G and T                     | G              | G          | L to V                  |
|           | 159*             | 476             | 170 A, 35 G              | G                           | G              | G          | N/S to S                |
|           | 216              | 646             | all A                    | all A                       | C and A        | C          | N to H                  |
|           | 218*             | 653             | all G                    | G except A in<br>Iowa05     | G              | G          | G except E in<br>Iowa05 |
|           | 222 <sup>^</sup> | 665             | 200 G; 5 T               | T                           | T              | T          | W/L/G to L              |
|           | 223              | 667             | 199 G; 6 A               | all G                       | A and G        | A          | V/I to I                |
|           | 258              | 774             | 177 T; 28 C              | all T                       | C and T        | C          | syn                     |
|           | 261*             | 783             | 197 A; 8 G               | C and A                     | C              | C          | K/R/G to N              |
|           | 262              | 784             | 201 A; 4 G               | all A                       | A and C        | C          | T/A to P                |
|           | 263              | 789             | 185 G; 20 A              | all G                       | A and G        | A          | syn                     |
|           | 323              | 968             | all A                    | A                           | A and G        | G          | syn                     |
|           | 328 <sup>^</sup> | 982             | all T                    | C                           | C              | C          | I to T                  |
|           | 333              | 998             | 107 A; 3 G               | A                           | A and G        | G          | syn                     |
|           | 334              | 1001            | all A                    | A                           | A and G        | G          | syn                     |
|           | 383              | 1148            | all A                    | A                           | A              | G          | syn                     |
|           | 427              | 1278            | all T                    | T                           | T              | C          | syn                     |
|           | 464              | 1390            | 98 G; 12 A               | G                           | A and G        | A          | G/N/D to G/D to D       |
|           | 472              | 1415            | all A                    | A                           | A              | G          | syn                     |
|           | 479 <sup>^</sup> | 1435            | 100 G; 10 A              | G and A                     | A              | A          | G/E to E                |
|           | 479 <sup>^</sup> | 1436            | all A                    | A                           | A and G        | G          | syn                     |
|           | 483 <sup>^</sup> | 1447            | all A                    | C                           | C              | C          | N to T                  |
|           | 484              | 1451            | 106 G; 4 A               | G                           | A              | A          | syn                     |

Microevolution of canine influenza virus

|      |      |            |                    |                     |   |                        |
|------|------|------------|--------------------|---------------------|---|------------------------|
| 492* | 1474 | 108 G; 2 A | G and A            | G except A in Vir09 | G | R/K to R               |
| 541^ | 1621 | all A      | A except G in F104 | A                   | A | all K except R in F104 |

**NA**

| Amino acid site | nucleotide site | equine references | canine 2003-05       | canine 2006-09 | NY 2008-09  | Amino acids               |
|-----------------|-----------------|-------------------|----------------------|----------------|-------------|---------------------------|
| 9^              | 25              | 73 G; 18 A        | A and G              | G              | G           | A/T to A                  |
| 12^             | 35              | 76 C; 15 T        | T                    | C              | C           | S/F to S                  |
| 20^             | 58              | 62 C; 29 A        | A                    | A              | A           | L/I to I                  |
| 40^             | 118             | 83 G; 8 A         | A                    | A              | A           | R/E/G to R                |
| 42^             | 125             | 83 G; 8 A         | A                    | A              | A           | D/G to D                  |
| 46^             | 138             | 58 C; 27 A; 6 T   | A                    | A              | A           | N/K to K                  |
| 52^             | 154             | all G             | G except A in Flor04 | G              | G           | all E except Flor 04 is K |
| 61^             | 182             | 68 G; 23 A        | A                    | A              | A           | R/K to K                  |
| 62              | 184             | 88 A; 3 G         | A                    | C              | C           | I/V to L                  |
| 68              | 203             | all C             | C                    | C              | T and C (B) | T to I/T (B)              |
| 69^             | 206             | 47 G; 44 A        | G                    | G              | G           | N/S to S                  |
| 72^             | 214             | 70 G; 21 A        | A                    | A              | A           | E/K to K                  |
| 81              | 243             | 89 C; 2 T         | C                    | T              | T           | syn                       |
| 147             | 439             | 85 G; 6 A         | G and A              | A              | A           | V/I/M to I                |
| 156             | 466             | all T             | T                    | C              | C           | syn                       |
| 171             | 512             | 90 G; 1 A         | G                    | A              | A           | R to K                    |
| 171             | 513             | 90 G; 1 A         | A and G              | A              | A           | same codon as 513         |
| 201^            | 601             | 60 G; 31 A        | A                    | A              | A           | V/I to I                  |
| 214             | 642             | 89 T; 2 C         | T                    | C              | C           | syn                       |
| 250             | 750             | all A             | A                    | T              | T           | Q/K to N                  |
| 261^            | 781             | 68 A; 23 G        | G                    | G              | G           | V/I to V                  |
| 291             | 873             | 89 G; 2 A         | G                    | G              | A and G (B) | syn                       |
| 301^            | 901             | 86 A; 5 G         | A and G              | A              | A           | V/I to I                  |
| 346             | 1038            | 82 A, 9 G         | A                    | C              | C           | syn                       |
| 383             | 1149            | all C             | C                    | T              | T           | syn                       |
| 396^            | 1186            | 68 A; 23 G        | G                    | G              | G           | N/D to D                  |
| 397^            | 1190            | 58 T; 33 C        | C                    | C              | C           | L/P to P                  |
| 412             | 1234            | 90 C; 1 T         | C                    | T              | T           | syn                       |
| 415             | 1245            | 51 G; 40 A        | G                    | G              | G and A     | syn                       |

**MP**

| Amino acid site | nucleotide site | equine references | canine 2003-05     | canine 2006-09 | NY 2008-09 | Amino acids            |
|-----------------|-----------------|-------------------|--------------------|----------------|------------|------------------------|
| 6               | 18              | all G             | G                  | G              | A (1 G)    | syn                    |
| 15              | 43              | 86 G; 14 A; 4 T   | G                  | A and G        | A          | V/I/L to I             |
| 99              | 297             | 74 G; 30 A        | G                  | G              | A          | syn                    |
| 126             | 378             | 103 C; 1 T        | C                  | C and T        | T          | syn                    |
| 138             | 412             | all G             | G                  | A and G        | A          | V to I                 |
| 161^            | 481             | all T             | T except G in F104 | T              | T          | all S except A in F104 |

Microevolution of canine influenza virus

|      |     |           |   |         |   |                                      |
|------|-----|-----------|---|---------|---|--------------------------------------|
| 183  | 549 | all T     | T | C and T | C | syn                                  |
| 195  | 584 | all C     | C | C and A | C | all S except STOP in B/06 & NY/Dec06 |
| 198  | 594 | all G     | G | A and G | A | syn                                  |
| 208^ | 623 | 97 A; 7 G | G | G       | G | Q/K/R to R                           |

**NS**

| Amino acid site | nucleotide site | equine references | canine 2003-05            | canine 2006-09 | NY 2008-09  | Amino acids       |
|-----------------|-----------------|-------------------|---------------------------|----------------|-------------|-------------------|
| 21              | 62              | all G             | G                         | A and G        | A           | R to Q            |
| 44^             | 131             | 70 A; 26 G        | G                         | G              | G           | R/K to R          |
| 59^             |                 | 74 G; 22 A        | A                         | A              | A           | R/H to H          |
|                 | 176             |                   |                           |                |             |                   |
| 71^             | 211             | 75 G; 21 A        | A                         | A              | A           | E/K to K          |
| 77              | 230             | 95 T; 1 C         | T                         | C and T        | C           | L/F/P to P        |
| 86^             | 256             | 75 G; 21 A        | A and G                   | G              | G           | V/T/A to A        |
| 88^             | 263             | all G             | G except T in F104        | G              | G           | R (F104 is L)     |
| 111             | 331             | all G             | G                         | G              | G and A (B) | V to I (B)        |
| 140^            | 418             | all A             | A except G in F103 and 04 | A              | A (1 G)     | R (G in F103, 04) |
| 156             | 466             | 93 G; 3 A         | G                         | G and A        | A           | V/I to I          |
| 185             | 553             | 95 C; 1 T         | C                         | C and T        | T           | L/F to F          |
| 193             | 578             | all G             | G                         | G              | A           | R to K            |
| 214             | 640             | all T             | T                         | T              | C           | F to L            |
| 216^            | 646             | 75 C; 21 T        | T                         | T              | T           | P/S to S          |
| 220             | 658             | 78 C; 18 T        | C and T                   | C              | C           | R/Q/STOP to R     |
| 244             | 731             | 89 T; 7 C         | T                         | T              | C           | I/T to T          |

**NP**

| Amino acid site | nucleotide site | equine references | canine 2003-05 | canine 2006-09 | NY 2008-09 | Amino acids          |
|-----------------|-----------------|-------------------|----------------|----------------|------------|----------------------|
| 12              | 33              | 64 G; 16 A        | A              | n/a            | A          | syn                  |
| 16^             | 47              | 40 G; 40 A        | A              | n/a            | A          | D/G to D             |
| 27              | 79              | all G             | G              | n/a            | A          | A to T               |
| 37              | 111             | 78 C; 1 G; 1 T    | A and C        | n/a            | A          | syn                  |
| 41              | 123             | all T             | C and T        | n/a            | C          | syn                  |
| 52              | 154             | all C             | C              | n/a            | T/C (B)    | H to Y/H (B)         |
| 93              | 279             | all A             | A              | n/a            | G          | syn                  |
| 144             | 432             | all T             | T              | n/a            | C          | syn                  |
| 157^            | 469             | 49 A; 31 G        | A              | n/a            | A          | T/A to T             |
| 166             | 496             | all C             | C              | n/a            | T          | syn                  |
| 198             | 594             | 79 A; 1 G         | G and A        | n/a            | G          | syn                  |
| 214^            | 641             | 75 G; 5 A         | G and A        | n/a            | G          | R/K to R             |
| 247             | 741             | 79 T; 1 C         | C              | n/a            | C          | syn                  |
| 252             | 756             | 77 G; 3 A         | G              | n/a            | A          | syn                  |
| 285^            | 853             | all G             | G, A, C        | n/a            | G          | V (I & L in K9 refs) |
| 286^            | 856             | 40 G; 40 A        | A              | n/a            | A          | A/T to T             |
| 325             | 975             | all G             | A and G        | n/a            | A          | syn                  |
| 327             | 981             | all G             | G              | n/a            | A          | syn                  |
| 359^            | 1075            | 75 G; 5 A         | A              | n/a            | A          | A/T to T             |
| 375^            | 1123            | all G             | A and G        | n/a            | A          | D to N               |

|      |      |            |   |     |         |          |
|------|------|------------|---|-----|---------|----------|
| 384^ | 1151 | 56 G; 24 A | A | n/a | A       | K/R to K |
| 389  | 1167 | all G      | G | n/a | A/G (B) | syn      |
| 392  | 1176 | 76 T; 4 C  | C | n/a | C       | syn      |
| 452^ | 1355 | 45 G; 35 A | A | n/a | A       | R/K to K |

**PA**

| Amino acid site | nucleotide site | equine references | canine 2003-05     | canine 2006-09 | NY 2008-09   | Amino acids             |
|-----------------|-----------------|-------------------|--------------------|----------------|--------------|-------------------------|
| 27^             | 79              | 76 G; 1 A         | A                  | n/a            | A            | D to N                  |
| 30              | 90              | 59 T; 18 C        | C                  | n/a            | C            | syn                     |
| 54              | 162             | 73 T; 4 C         | A and T            | n/a            | A            | syn                     |
| 62^             | 184             | 59 A; 18 G        | G                  | n/a            | G except 1 A | V/I to V                |
| 147             | 441             | 76 T; 1 C         | T                  | n/a            | C            | syn                     |
| 213^            | 638             | 61 G; 16 A        | A                  | n/a            | A            | R/K to K                |
| 231             | 693             | all C             | C                  | n/a            | T            | syn                     |
| 233             | 699             | all G             | A and G            | n/a            | A            | syn                     |
| 256             | 767             | 75 G; 2 A         | A and G            | n/a            | A            | R/K to K                |
| 293             | 879             | all G             | G                  | n/a            | A            | syn                     |
| 300             | 900             | all G             | G                  | n/a            | A            | syn                     |
| 301             | 903             | all A             | A and G            | n/a            | G            | syn                     |
| 319             | 957             | all G             | G                  | n/a            | A            | syn                     |
| 327             | 979             | all G             | A and G            | n/a            | A            | E to K                  |
| 332             | 996             | 62 A; 15 G        | G                  | n/a            | G            | syn                     |
| 337^            | 1009            | 59 G; 18 A        | A                  | n/a            | A            | T/A to T                |
| 343^            | 1028            | 62 C; 15 A        | A                  | n/a            | A            | A/E to E                |
| 345^            | 1033            | 61 C; 15 A; 1 T   | A                  | n/a            | A            | L/I to I                |
| 348             | 1042            | 73 C; 4 A         | C                  | n/a            | A            | L/I to I                |
| 353^            | 1058            | 63 A; 14 G        | G                  | n/a            | A            | K/R to K                |
| 356             | 1068            | all G             | G                  | n/a            | A            | syn                     |
| 366             | 1098            | all G             | G                  | n/a            | A            | syn                     |
| 392             | 1176            | 71 G; 6 A         | A                  | n/a            | A            | syn                     |
| 400             | 1198            | 72 A; 3 C; 2 G    | G and A            | n/a            | G            | T/P/A to A              |
| 413             | 1238            | all A             | A and G            | G              | G            | syn                     |
| 432             | 1295            | 62 T; 15 C        | C                  | C              | C            | I/V to V                |
| 444             | 1329            | all A             | A                  | A and G        | G            | N to D                  |
| 444             | 1331            | all T             | T                  | T              | C            | syn -same codon as 1329 |
| 450^            | 1347            | 59 G; 17 A; 1 T   | A                  | A              | A            | V/I/F to I              |
| 460^            | 1379            | all G             | G except A in F104 | G              | G            | M except I in F104      |
| 461             | 1382            | 62 G; 15 A        | A                  | A              | A            | syn                     |
| 551             | 1652            | 69 G; 8 A         | A                  | A              | A            | syn                     |
| 589             | 1766            | 59 G; 18 A        | G                  | A and G        | A            | syn                     |
| 611             | 1832            | 57 C; 20 T        | T                  | T              | T            | syn                     |
| 657             | 1970            | 75 G; 2 A         | A and G            | A              | A            | syn                     |
| 673^            | 2018            | all G             | A and G            | A              | A            | syn                     |
| 675^            | 2022            | all A             | G                  | G              | G            | N to D                  |
| 702             | 2105            | 60 C; 16 T; 1     | T                  | T              | T            | syn                     |

|                  |                 | A                 |                    |                |             |                    |
|------------------|-----------------|-------------------|--------------------|----------------|-------------|--------------------|
| 711              | 2132            | all T             | C and T            | C              | C           | syn                |
| <b>PB1</b>       |                 |                   |                    |                |             |                    |
| Amino acid site  | nucleotide site | equine references | canine 2003-05     | canine 2006-09 | NY 2008-09  | Amino acids        |
| 8                | 24              | 61 C; 20 T        | C and T            | T              | T           | syn                |
| 46               | 138             | all A             | A                  | A and G        | G           | syn                |
| 52               | 156             | 72 G; 9 A         | A                  | A              | A           | syn                |
| 56               | 167             | all C             | C                  | C              | T and C (B) | T to I/T (B)       |
| 110              | 330             | 67 G; 14 A        | G                  | A and G        | A           | syn                |
| 114 <sup>^</sup> | 340             | 60 G; 21 A        | A                  | A              | A           | V/I to I           |
| 149              | 447             | 75 G; 6 A         | A                  | A              | A           | syn                |
| 154 <sup>^</sup> | 461             | 62 A; 19 G        | G                  | G              | G           | D/G to G           |
| 164              | 492             | 75 G; 6 A         | G                  | G and A        | A           | M/I to I           |
| 200              | 598             | all G             | G and A            | A              | A           | V to I             |
| 221 <sup>^</sup> | 661             | 60 G; 21 A        | A                  | A              | A           | A/T to T           |
| 279              | 837             | 80 G; 1 A         | G                  | A and G        | A           | syn                |
| 317 <sup>^</sup> | 951             | 58 G; 23 A        | A                  | A              | A           | M/I to I           |
| 328              | 984             | all C             | C and T            | T              | T           | syn                |
| 338              | 1013            | all G             | G                  | A and G        | A           | S to N             |
| 374              | 1122            | all A             | A                  | A and G        | G           | syn                |
| 378              | 1134            | all G             | A                  | A              | A           | syn                |
| 395              | 1185            | all T             | C and T            | too short      | C           | syn                |
| 395              | 1186            | all C             | C                  | too short      | T           | syn                |
| 398              | 1192            | 79 G; 2 A         | G                  | too short      | A           | D/N to N           |
| 431              | 1293            | all C             | C and T            | T              | T           | syn                |
| 433              | 1299            | all G             | G                  | A and G        | A           | syn                |
| 459 <sup>^</sup> | 1375            | all A             | A except G in F104 | A              | A           | I except V in F104 |
| 487              | 1461            | 75 C; 7 T         | T                  | T              | T           | syn                |
| 529              | 1585            | all G             | G                  | A and G        | A           | V to I             |
| 579              | 1737            | 81 G; 1 A         | G                  | T              | T           | syn                |
| 584              | 1751            | 76 G; 6 A         | G                  | A              | A           | R/Q to Q           |
| 591              | 1771            | all G             | G                  | G and A        | A           | A/V to I           |
| 612              | 1836            | all A             | A                  | A              | G           | syn                |
| 682 <sup>^</sup> | 2044            | 81 A; 1 G         | A except G in F104 | A              | A           | I except 2 V       |
| 687              | 2061            | 81 G; 1 A         | G                  | G and T        | T           | Q to H             |
| 701              | 2103            | all C             | C                  | A              | A           | syn                |
| 719              | 2157            | all G             | A and G            | A              | A           | syn                |
| 754              | 2261            | all G             | G                  | A and G        | A           | R to K             |
| <b>PB2</b>       |                 |                   |                    |                |             |                    |
| Amino acid site  | nucleotide site | equine references | canine 2003-05     | canine 2006-09 | NY 2008-09  | Amino acids        |
| 5 <sup>^</sup>   | 13              | all A             | 3 A; 1 G           | n/a            | n/a         | K except E in F104 |
| 12 <sup>^</sup>  | 35              | T and C           | all T              | n/a            | n/a         | S/L to L           |
| 37 <sup>^</sup>  | 110             | all G             | 3 G; 1 A           | n/a            | n/a         | G except E in F104 |
| 175 <sup>^</sup> | 524             | all G             | 3 G; 1 T           | n/a            | n/a         | R except I in F104 |
| 374 <sup>^</sup> | 1120            | All C             | All A              | n/a            | n/a         | L to I             |

Microevolution of canine influenza virus

|                  |      |            |                    |     |       |                    |
|------------------|------|------------|--------------------|-----|-------|--------------------|
| 375 <sup>^</sup> | 1124 | all G      | G except A in F104 | n/a | all G | R except K in F104 |
| 384              | 1150 | 81 T; 1 A  | T                  | n/a | C     | syn                |
| 388              | 1164 | 75 G; 7 A  | G                  | n/a | A     | syn                |
| 389              | 1166 | all G      | G                  | n/a | A     | R to K             |
| 428              | 1284 | all G      | G                  | n/a | A     | syn                |
| 447 <sup>^</sup> | 1341 | 62 G; 20 A | A except C in F104 | n/a | A     | Q except H in F104 |
| 471              | 1413 | 72 C; 10 T | C                  | n/a | T     | syn                |
| 472              | 1416 | all G      | G                  | n/a | A     | syn                |
| 559              | 1676 | all T      | T                  | n/a | A     | I/F to N           |
| 581              | 1743 | 77 G; 5 A  | A                  | n/a | A     | syn                |
| 595              | 1785 | all C      | C                  | n/a | T     | syn                |
| 642              | 1926 | 77 A; 5 T  | T                  | n/a | T     | syn                |
| 644              | 2010 | all G      | G                  | n/a | A     | syn                |
| 713              | 2139 | 64 G; 18 A | T and A            | n/a | T     | syn                |
| 722              | 2166 | 62 T; 20 C | C                  | n/a | C     | syn                |
| 724              | 2172 | 62 G; 20 A | A                  | n/a | A     | syn                |
| 731              | 2191 | 81 G; 1 A  | G except 1 R       | n/a | A     | V/I to I           |
| 731              | 2193 | 62 G; 20 A | A                  | n/a | A     | syn                |

<sup>^</sup> sites identified in Crawford et al. (2005)

\* sites identified in Payungporn et al. (2008)
